# Supplementary material
Source: PubMed Central journal article supplement (PMC4564055)
Supplement: NIHMS694349-supplement-supplement_1.pdf [file NIHMS694349-supplement-supplement_1.pdf]

Supplemental File (for access via journal web site only)

**Table A. Selected psychosocial health, social participation, and health-related quality of life variables for each level of work limitation status in adults aged 18 years and older by epilepsy status, 2010 National Health Interview Survey<sup>a</sup>.**

|                                                              | No History of Epilepsy |                  | History of Epilepsy |                  | Active Epilepsy <sup>b</sup> |                  | Inactive Epilepsy <sup>b</sup> |                  |
|--------------------------------------------------------------|------------------------|------------------|---------------------|------------------|------------------------------|------------------|--------------------------------|------------------|
|                                                              | N                      | % (95%)          | N                   | % (95%)          | N                            | % (95%)          | N                              | % (95%)          |
| <b>Having Serious Psychological Distress (Kessler-6)</b>     |                        |                  |                     |                  |                              |                  |                                |                  |
| Unable to work                                               | 372                    | 36.5 (33.1-40.1) | 50                  | 62.6 (47.8-75.4) | 37                           | 64.0 (46.8-78.3) | 12                             | *                |
| Limited in work                                              | 104                    | 11.6 (9.1-14.8)  | 8                   | *                | 6                            | *                | 2                              | *                |
| Not limited in work                                          | 485                    | 51.9 (48.0-55.7) | 12                  | 24.1 (14.4-37.4) | 9                            | 20.5 (11.4-34.0) | 3                              | *                |
| <b>Not having Serious Psychological Distress (Kessler-6)</b> |                        |                  |                     |                  |                              |                  |                                |                  |
| Unable to work                                               | 1,885                  | 6.3 (5.9-6.7)    | 123                 | 22.9 (18.6-27.9) | 88                           | 28.5 (22.1-35.9) | 33                             | 15.2 (10.2-22.0) |
| Limited in work                                              | 1,174                  | 4.1 (3.8-4.5)    | 61                  | 13.4 (10.3-17.1) | 33                           | 13.1 (9.2-18.3)  | 28                             | 14.5 (9.8-20.9)  |
| Not limited in work                                          | 22,488                 | 89.6 (89.1-90.1) | 223                 | 63.8 (58.6-68.6) | 101                          | 58.4 (50.8-65.6) | 120                            | 70.3 (63.2-76.5) |
| <b>Having Cognitive Limitation</b>                           |                        |                  |                     |                  |                              |                  |                                |                  |
| Unable to work                                               | 670                    | 65.7 (61.7-69.5) | 89                  | 72.6 (61.3-81.6) | 71                           | 71.4 (58.5-81.5) | 17                             | *                |
| Limited in work                                              | 132                    | 14.9 (12.4-17.8) | 20                  | 19.3 (12.1-29.2) | 15                           | 20.5 (12.3-32.1) | 5                              | *                |
| Not limited in work                                          | 189                    | 19.5 (16.6-22.6) | 9                   | *                | 7                            | 8.1 (3.9-16.2)*  | 1                              | *                |
| <b>Not Having Cognitive Limitation</b>                       |                        |                  |                     |                  |                              |                  |                                |                  |
| Unable to work                                               | 1,611                  | 5.5 (5.1-5.9)    | 86                  | 18.0 (13.8-23.1) | 56                           | 22.3 (15.9-30.3) | 28                             | 12.5 (8.0-19.1)  |

|                                                                |        |                  |     |                  |     |                  |     |                  |
|----------------------------------------------------------------|--------|------------------|-----|------------------|-----|------------------|-----|------------------|
| Limited in work                                                | 1,158  | 4.1 (3.8-4.4)    | 49  | 12.0 (8.8-16.1)  | 24  | 10.6 (6.7-16.4)  | 25  | 14.1 (9.4-20.6)  |
| Not limited in work                                            | 22,885 | 90.5 (90.0-90.9) | 227 | 70.0 (64.5-75.0) | 104 | 67.1 (59.0-74.3) | 122 | 73.4 (66.4-79.3) |
| <b>Using Transportation to Get to Places (Do the activity)</b> |        |                  |     |                  |     |                  |     |                  |
| Unable to work                                                 | 304    | 4.7 (4.0-5.4)    | 14  | *                | 8   | *                | 5   | *                |
| Limited in work                                                | 238    | 4.2 (3.6-5.0)    | 14  | 15.2 (8.2-26.3)  | 5   | *                | 9   | *                |
| Not limited in work                                            | 4,843  | 91.1 (90.0-92.0) | 51  | 70.2 (58.5-79.7) | 25  | 71.3 (53.9-84.0) | 25  | 69.2 (52.9-81.8) |
| <b>Not Using/Unable to Use Transportation to Get to Places</b> |        |                  |     |                  |     |                  |     |                  |
| Unable to work                                                 | 163    | 25.8 (21.7-30.3) | 20  | *                | 17  | *                | 3   |                  |
| Limited in work                                                | 55     | 10.7 (8.0-14.3)  | 2   | *                | 0   |                  | 2   | *                |
| Not limited in work                                            | 356    | 63.5 (58.6-68.2) | 3   | *                | 2   | *                | 1   | *                |
| <b>General Mental Health is Excellent or Very Good</b>         |        |                  |     |                  |     |                  |     |                  |
| Unable to work                                                 | 583    | 3.1 (2.8-3.4)    | 30  | 13.0 (8.2-20.1)  | 18  | 14.3 (8.0-24.3)  | 11  | *                |
| Limited in work                                                | 517    | 2.8 (2.5-3.1)    | 21  | 9.9 (6.3-15.1)   | 10  | *                | 11  | *                |
| Not limited in work                                            | 14,715 | 94.1 (93.7-94.6) | 110 | 77.1 (70.1-82.8) | 43  | 76.9 (66.6-84.8) | 67  | 77.6 (69.1-84.2) |
| <b>General Mental Health is Good</b>                           |        |                  |     |                  |     |                  |     |                  |
| Unable to work                                                 | 725    | 9.8 (9.0-10.7)   | 46  | 27.2 (19.7-36.3) | 31  | 33.1 (21.6-47.0) | 14  | 17.0 (10.4-26.6) |
| Limited in work                                                | 434    | 5.9 (5.2-6.7)    | 21  | 16.6 (10.4-25.4) | 12  | *                | 9   | *                |
| Not limited in work                                            | 5,422  | 84.2 (83.1-85.3) | 77  | 56.2 (46.0-65.8) | 39  | 52.6 (38.4-66.4) | 36  | 61.1 (46.5-74.0) |

**General Mental Health is Poor or Fair**

|                     |       |                  |    |                  |    |                  |    |                  |
|---------------------|-------|------------------|----|------------------|----|------------------|----|------------------|
| Unable to work      | 768   | 35.1 (32.6-37.6) | 85 | 58.8 (48.0-68.9) | 66 | 64.9 (52.3-75.7) | 18 | 45.9 (29.3-63.4) |
| Limited in work     | 231   | 12.7 (10.8-14.8) | 24 | 17.9 (11.4-26.9) | 15 | 20.2 (12.0-31.8) | 9  | *                |
| Not limited in work | 1,045 | 52.2 (49.5-55.0) | 30 | 23.3 (15.4-33.7) | 16 | 14.9 (7.8-26.8)* | 14 | 40.6 (25.3-57.9) |

**The Mental Health Summary Scale is 14-20 Points**

|                     |        |                  |     |                  |    |                  |    |                  |
|---------------------|--------|------------------|-----|------------------|----|------------------|----|------------------|
| Unable to work      | 718    | 3.3 (2.9-3.6)    | 44  | 16.7 (11.5-23.4) | 30 | 22.1 (13.8-33.3) | 14 | *                |
| Limited in work     | 667    | 3.1 (2.8-3.4)    | 27  | 10.3 (6.8-15.4)  | 13 | *                | 14 | 12.2 (7.0-20.5)  |
| Not limited in work | 17,441 | 93.7 (93.2-94.1) | 148 | 73.0 (66.3-78.8) | 63 | 68.9 (57.7-78.3) | 85 | 77.2 (69.3-83.5) |

**The Mental Health Summary Scale is 4-13 Points**

|                     |       |                  |     |                  |    |                  |    |                  |
|---------------------|-------|------------------|-----|------------------|----|------------------|----|------------------|
| Unable to work      | 1,328 | 22.1 (20.8-23.6) | 115 | 44.7 (36.9-52.8) | 83 | 50.2 (40.0-60.3) | 29 | 35.1 (24.3-47.7) |
| Limited in work     | 506   | 9.2 (8.2-10.2)   | 37  | 17.7 (12.5-24.3) | 23 | 18.3 (12.0-26.9) | 14 | *                |
| Not limited in work | 3,658 | 68.7 (67.1-70.2) | 69  | 37.6 (30.2-45.7) | 35 | 31.5 (22.2-42.6) | 32 | 47.3 (35.8-59.1) |

---

<sup>a</sup> The number of respondents is unweighted; the percentage estimates are weighted. Estimates are model-based and adjusted for age, race/ethnicity, gender, and income.

<sup>b</sup> Those with active or inactive epilepsy are subsets of those with a history of epilepsy. Five adults with epilepsy could not be classified further.

\* The estimate is unreliable because the relative standard error  $\geq 30\%$ .
